# Supplementary material for: Procoagulant Extracellular Vesicles Alter Trophoblast Differentiation in Mice by a Thrombo-Inflammatory Mechanism
Source: MDPI journal article supplement (doi:10.3390/ijms22189873), 2021-09-13
Supplement: s1 [file s1]

**Supplementary Table-S1: Patient Characteristics**

|                                        | <b>Controls (n=14)</b> |           | <b>PE (n=14)</b> |           |                |
|----------------------------------------|------------------------|-----------|------------------|-----------|----------------|
|                                        | <b>Mean</b>            | <b>SD</b> | <b>Mean</b>      | <b>SD</b> | <b>P value</b> |
| <b>Age (years)</b>                     | 34                     | 4         | 31               | 5         | 0.08           |
| <b>BMI (kg/m<sup>2</sup>)</b>          | 28                     | 4         | 28               | 6         | 0.57           |
| <b>Parity</b>                          |                        |           |                  |           |                |
| <b>Primipara</b>                       | 7 (50%)                |           | 10 (71.14%)      |           | 1              |
| <b>Multipara</b>                       | 7 (50%)                |           | 4 (28.57%)       |           |                |
| <b>Systolic blood pressure (mmHg)</b>  | 122.50                 | 8.61      | 166.79           | 8.15      | <0.001         |
| <b>Diastolic blood pressure (mmHg)</b> | 75.00                  | 7.07      | 103.57           | 10.42     | <0.001         |
| <b>Proteinuria (g/24h)</b>             | 0.00                   | 0.00      | 3995.07          | 4794.75   | <0.001         |
| <b>Gestational diabetes</b>            | 0                      | 0         | 0                | 0         | -              |
| <b>Gestational age at birth</b>        | 40                     | 1         | 36               | 4         | 0.01           |
| <b>Relative birth weight (weeks)</b>   | 3447.14                | 295.48    | 2420.33          | 252.16    | 0.004          |
| <b>Method of delivery</b>              |                        |           |                  |           |                |
| <b>Vaginal</b>                         | 0                      | 0         | 0                | 0         | -              |
| <b>C-section</b>                       | 14                     | 0         | 14               | 0         | -              |
| <b>Sex of child</b>                    |                        |           |                  |           |                |
| <b>Boy</b>                             | 7 (50%)                |           | 7 (50%)          |           | 1              |
| <b>Girl</b>                            | 7 (50%)                |           | 7 (50%)          |           |                |
